# Supplementary material for: Alternative pathways utilize or circumvent putrescine for biosynthesis of putrescine-containing rhizoferrin
Source: PubMed Central journal article supplement (PMC7857480; doi:10.1074/jbc.ra120.016738), 2020-12-10
Supplement: mmc1.pdf [file mmc1.pdf]

## SUPPLEMENTARY DATA

Putrescine utilization/circumvention pathways for  $N^1,N^4$ -dicitrylputrescine (rhizoferrin) biosynthesis, and structure of  $N$ -citrlyornithine decarboxylase

Bin Li<sup>1</sup>, Xiaoyi Deng<sup>1</sup>, Sok Ho Kim<sup>1,#</sup>, Leann Burrow<sup>1</sup>, Diane R. Tomchick<sup>2</sup>, Margaret A. Phillips<sup>1</sup>, Anthony J. Michael<sup>1,\*</sup>

<sup>1</sup>Department of Biochemistry, University of Texas Southwestern Medical Center, Dallas, Texas, USA

<sup>2</sup>Department of Biophysics, University of Texas Southwestern Medical Center, Dallas, Texas, USA

<sup>#</sup>Current Address: Realtox Labs, 200 Business Center Dr., Reistertown, MD 21136, USA

Corresponding author: Anthony J. Michael

\*E-mail: [anthony.michael@utsouthwestern.edu](mailto:anthony.michael@utsouthwestern.edu)

**Running title:** Rhizoferrin biosynthesis with or without putrescine

**Table S1. FigC X-ray data collection and refinement statistics**

| <b>Data collection</b>                                                 |                                                            |
|------------------------------------------------------------------------|------------------------------------------------------------|
| Crystal                                                                | SeMet peak <sup>a</sup>                                    |
| Space group                                                            | P2 <sub>1</sub> 2 <sub>1</sub> 2                           |
| Cell constant (Å)                                                      | <i>a</i> = 70.8, <i>b</i> =279.1, <i>c</i> =108.6          |
| Wavelength (Å)                                                         | 0.97932                                                    |
| Resolution range (Å)                                                   | 40.65 – 2.05 (2.09 – 2.05)                                 |
| Unique reflections                                                     | 136495 (6761)                                              |
| Multiplicity                                                           | 13.2 (12.2)                                                |
| Data completeness (%)                                                  | 99.9 (99.5)                                                |
| <i>R</i> <sub>merge</sub> (%) <sup>b</sup>                             | 7.5 (110)                                                  |
| <i>R</i> <sub>pim</sub> (%) <sup>c</sup>                               | 2.1 (32.2)                                                 |
| <i>I</i> / $\sigma$ ( <i>I</i> )                                       | 36.0 (2.4)                                                 |
| Wilson B-value (Å <sup>2</sup> )                                       | 23.6                                                       |
| <b>Phase determination</b>                                             |                                                            |
| Anomalous scatterers                                                   | selenium, 15 out of 20 possible sites (4 molecules in ASU) |
| Figure of merit (121.8 – 2.60 Å)                                       | 0.88                                                       |
| <b>Refinement statistics</b>                                           |                                                            |
| Resolution range (Å)                                                   | 40.65 – 2.05 (2.08 – 2.05)                                 |
| No. of reflections <i>R</i> <sub>work</sub> / <i>R</i> <sub>free</sub> | 134,364/2,065(4,824/72)                                    |
| Data completeness (%)                                                  | 90.9 (47.8)                                                |
| Atoms (non-H protein)/water                                            | 13189/383                                                  |
| <i>R</i> <sub>work</sub> / <i>R</i> <sub>free</sub> (%)                | 17.37 (23.60) / 19.92 (24.63)                              |
| R.m.s.d. bond length (Å)                                               | 0.005                                                      |
| R.m.s.d. bond angle (°)                                                | 0.661                                                      |
| Mean B-value (Å <sup>2</sup> )                                         | 39.0                                                       |
| Ramachandran plot (%)<br>(favored/additional/disallowed) <sup>d</sup>  | 96.56/3.38/0.06                                            |
| Missing residues                                                       | A: 1, 170-175; B: 1, 170-176; C: 170-177;<br>D: 172-174    |

Data for the outermost shell are given in parentheses.

<sup>a</sup>Bijvoet-pairs were kept separate for data processing.

<sup>b</sup> $R_{\text{merge}} = 100 \sum_h \sum_i |I_{h,i} - \langle I_h \rangle| / \sum_h \sum_i \langle I_{h,i} \rangle$ , where the outer sum (h) is over the unique reflections and the inner sum (i) is over the set of independent observations of each unique reflection.

<sup>c</sup> $R_{\text{pim}} = 100 \sum_h \sum_i [1/(n_h - 1)]^{1/2} |I_{h,i} - \langle I_h \rangle| / \sum_h \sum_i \langle I_{h,i} \rangle$ , where  $n_h$  is the number of observations of reflections **h**.

<sup>d</sup>As defined by the validation suite MolProbity (Chen, V.B., Arendall, W.B.A., Headd, J.J., Keedy, D.A., Immormino, R.M., Kapral, G.J., Murray, L.W., Richardson, J.S., Richardson, D.C. (2010) *MolProbity*: all-atom structure validation for macromolecular crystallography. *Acta Cryst.* **D66**, 12-21.).

**Table S2 FigC Docking Atomic Distances**

Distances were calculated between hydrogen bond acceptor to donor. In cases where hydrogens were included in model refinement or with defined amine hydrogen positioning, the hydrogen to bond acceptor distance is included in parenthesis.

| Ligand                   | Protein residue | Protein atom | Ligand atom | Interatomic distance (Å) | Interaction type                                                                                                |
|--------------------------|-----------------|--------------|-------------|--------------------------|-----------------------------------------------------------------------------------------------------------------|
| Crystallographic PLP     | Glu82           | OE2          | PLP N1      | 3.3                      | Electrostatic/ hydrogen bond potential                                                                          |
|                          | Glu287          | OE1          | PLP N1      | 2.7                      | Electrostatic/ hydrogen bond potential                                                                          |
|                          | Gly239          | N            | PLP OP3     | 3.0 (2.1)                | Hydrogen bond with Gly239 donor                                                                                 |
|                          | Gly289          | N            | PLP OP3     | 2.9 (2.1)                | Hydrogen bond with Gly239 donor                                                                                 |
|                          | Arg290          | N            | PLP OP2     | 2.8 (2.0)                | Hydrogen bond with Arg290 donor                                                                                 |
|                          | Tyr383          | OH           | PLP OP2     | 2.6 (1.8)                | Hydrogen bond with Tyr383 donor                                                                                 |
|                          | Thr201          | OH           | PLP OP1     | 3.3 (2.4)                | Hydrogen bond with Thr201 donor                                                                                 |
| Docked PLP moiety        | Glu82           | OE1          | PLP N1      | 3.9                      | Electrostatic                                                                                                   |
|                          | Glu287          | OE2          | PLP N1      | 3.2                      | Electrostatic                                                                                                   |
|                          | Gly239          | N            | PLP OP4     | 3.1                      | Docked PLP suggests that Gly239 may interact with either OP3 or OP4                                             |
|                          | Gly239          | N            | PLP OP3     | 3.5                      |                                                                                                                 |
|                          | Gly289          | N            | PLP OP2     | 3.2                      | Hydrogen bond with Gly239 donor                                                                                 |
|                          | Arg290          | N            | PLP OP1     | 2.9                      | Docked PLP suggests that Arg 290 may be too close to OP1 while hydrogen bonding with OP2                        |
|                          | Arg290          | N            | PLP OP2     | 2.3                      |                                                                                                                 |
|                          |                 | Tyr383       | OH          | PLP OP2                  | 2.7                                                                                                             |
|                          | Thr201          | OH           | PLP OP1     | 3.0                      | Hydrogen bond with Thr201 donor is possible but docking suggests this may coordinate the citrate moiety instead |
| Docked putrescine moiety | None predicted  |              |             |                          |                                                                                                                 |
| Docked citrate moiety    | Thr201          | OG1          | COOH 1      | 3.3                      | Hydrogen bond with Thr201 donor                                                                                 |
|                          | Arg290          | NH2          | COOH 1      | 3.3 (2.9)                | Hydrogen bond with Arg290 donor                                                                                 |
|                          | Arg290          | NH2          | COOH 6      | 2.1 (1.1)                | Hydrogen bond with Arg290 donor                                                                                 |
|                          | Thr327          | OH           | COOH 6      | 3.5                      | Unlikely to make hydrogen bond even with the alternate Thr conformer                                            |
|                          | Arg387          | NH1          | COOH 5      | 3.3 (2.7)                | Hydrogen bond with Arg387 donor                                                                                 |

**Figure S1** *A*, Alignment of rhizoferrin MFS efflux transporters with *E. coli* MdtG. Transporters from *F. novicida* U112 (*FnovFigB*, YP\_899294), *L. pneumophila* (*LpneLbtB*, WP\_010947055), *R. pickettii* (*RpicMFS*, YP\_002980162) and *E. coli* K12 (*EcolMdtG*, NP\_415571) are shown aligned. Alignment was performed with ClustalW, totally conserved amino acids are highlighted with a red background, conserved hydrophobic positions with a black background. *B*, Unrooted Maximum Likelihood tree of the sequences aligned in (*A*). Sequences were aligned with MUSCLE. *C*, Structure of ciprofloxacin.

**A**

```

*          20          *          40          *          60
FnovFigB : -----MNNHTKAQITLLLCFCOLIIITAAEMEMSNPFLPIYLQSLGDFDLLPVNAWNVLAYAM : 55
LpneLbtB : -----MNKLVQKMLSG---QFLMILALEMTNPFLLPLLIAHQSNTPVPSVVIYNTLSLVL : 52
RpicMFS : --MSPATPVDARWGAIRWLLVIQALSMGAMEMTGPFWPLFLRELLPVPHVPPFAWVASAAYFA : 60
EcolMdtG : MSPCENDTPINWKRNLIVAWLGCFLTGAAFSLVMFPFLPLYVEQLGVTGHSALNMWSGIVFESI : 62

*          80          *          100         *          120
FnovFigB : PLISAMLFSPFWGKYADRFQYKTMILRAALALAIIQLLIYLTNSALLFVILRFIQGAIAGFL : 117
LpneLbtB : PMLANILLTPIWGLAADRYGYPMLMRASWALVLTQASMI FVNSVFWILIIIRLLQGAFAAGFL : 114
RpicMFS : PMAATLVTA PWWGRLADRVGPKMILRALIALAASQLWSVYADSAASVLLARTVQGGLAGFL : 122
EcolMdtG : TFLFSAIASPFWGGLADRKGRKMLLRSA LGMGIVMVLMLGLAQNIWQFLILRALLGLLGGFV : 124

*          140         *          160         *          180
FnovFigB : LAAQSYAVVIVSKEFRSRILAWLOSATAIGIAGPLVGGILATLLSYKQIFLITCAITACCIF : 179
LpneLbtB : VAMQTYALSITTEWQSKSTQLSRLOSSKAIATSTAGFLGGLALSFTNYQGLFGLATLICLGTT : 176
RpicMFS : AAAQIYAMRVAPADMRRRVFADLOTVTACGSFMAPPVGAWLVGWGMGFRMANTAGAAVILACI : 184
EcolMdtG : PNAALIAIQVPRNKSGWALGTSTGGVSGALLGPMAGLLADSYGLRPVFFITASVLLILCF : 186

*          200         *          220         *          240
FnovFigB : IILLIKLESISNPSLLSKQDNNKNCYHKNTSNNYLIYVYFVSVIFLAAILLSQTAKFLPQSEFA : 241
LpneLbtB : VVMHYKLPSPPKQQIKKRSQTLNHSYTSK-----VFFFLCVLIMLTIQIAKFLPDPGET : 230
RpicMFS : PLAMFCLPAIKPAPKSEIHQDADARRAGRPLG---GLVIGLLGMVAVQAARVMPQGF LA : 242
EcolMdtG : FVTLECIREKFQPVSKKEMLHMREVVTSLKNPK----LVLSLFTTLLIQVATGSIAPILT : 243

*          260         *          280         *          300         *
FnovFigB : IYAKEFFS---SDPTIIAATYAAPAFSLLLFSAPIGHLFDKLLNKQVNNQYFFASSYFIIIF : 300
LpneLbtB : IYLNKYCS---NNLVLIGFLYSLPAMGMLCSSVWCQKQFDYCRSQPS-----LVNQYLIRYS : 284
RpicMFS : PYITETLH---GSVMLAGLAYSATAATLALSARWWAKRFASLPVHVT-----LGRVCALT : 294
EcolMdtG : IYVRELAGNVSNVAFISGMIASVPGVAALLSAPRLGKLGDRIGPEKI-----LITAL : 295

*          320         *          340         *          360         *
FnovFigB : AISTVAIYVHGFTHNIYLI LAARFILGVTFAGTLPCLFSLACRTKDNN-FGFLIGYCNTFSK : 361
LpneLbtB : VEGAILMI IQANVDNFYLFALIRILWGVLAALLPALFALCS-DRNLL-PGYALGLANSFAK : 344
RpicMFS : AVCCGLTAIWQGIAQGENAFIAARLAWGLCLGGLLPVLNSLVVETSPEHRQGFALGLCSSAAK : 356
EcolMdtG : IFSVLLIIPMSYVQTPLOLGILRFLLG AADGALLPAVQTL LVYNSSNQIAGRIFSYNQSF RD : 357

*          380         *          400         *          420         *
FnovFigB : FGNLCGIFLGGFIFQISSMQTVFYVTAIIYMLFVVIYICLLYLFDLKSSNFKNKELINV- : 420
LpneLbtB : LGNLI GLLGGLFAFYLPYPAIFMI IAGIYSLFAIFVYGYDRLNVRQMTDFSN SYFNVKS : 404
RpicMFS : GGALIGLVAAALSTGLFGWRAGFVAMAAMYLAALAALIAVRRRAASPHPASAAAGTQRA-- : 414
EcolMdtG : IGNVTCPLMGAAISANYGFRAVFLVTAGVVLFNAVYSWNSLRRRRIPQVSN----- : 408

```

**B**

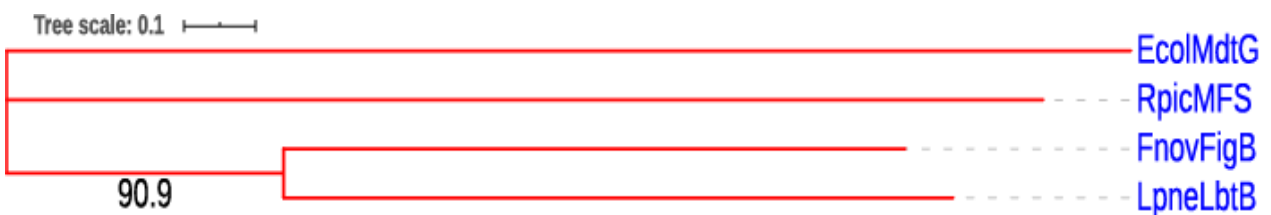

**C**

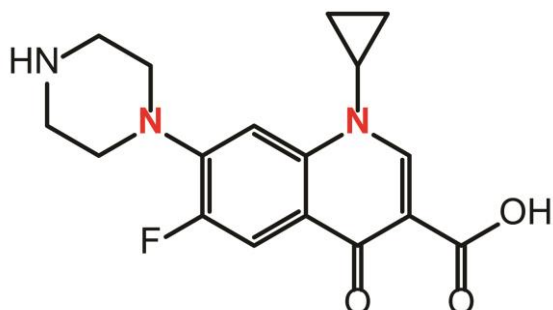

**Figure S1**

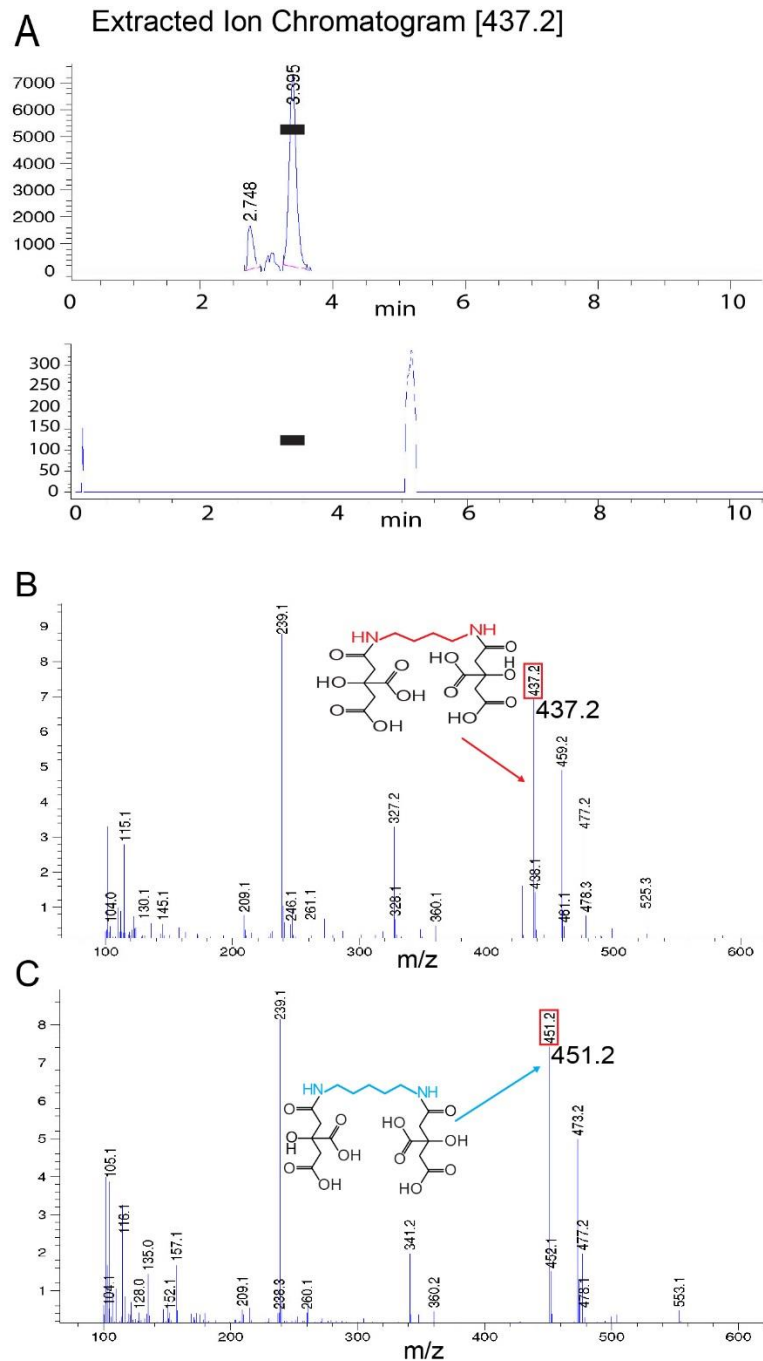

**Figure S2. *In vitro* products of purified recombinant *R. pickettii* FigA homologue NIS synthetase activity detected by LC-MS.** A, Extracted Ion Chromatograms (EIC) for the mass of rhizoferrin (437/438). Top panel, products of *R. pickettii* NIS synthetase with putrescine and Na-citrate substrates; bottom panel, no enzyme control. B, Mass spectrum of LC peak (3.3 min) obtained after *in vitro* incubation of *R. pickettii* NIS synthetase with putrescine. A mass corresponding to rhizoferrin is present at  $m/z$  437.2 and its sodium adduct at  $m/z$  459.2. C, Mass spectrum of LC peak obtained after *in vitro* incubation of *R. pickettii* NIS synthetase with cadaverine. A mass corresponding to homorhizoferrin is present at  $m/z$  451.2 and its sodium adduct at  $m/z$  473.2.

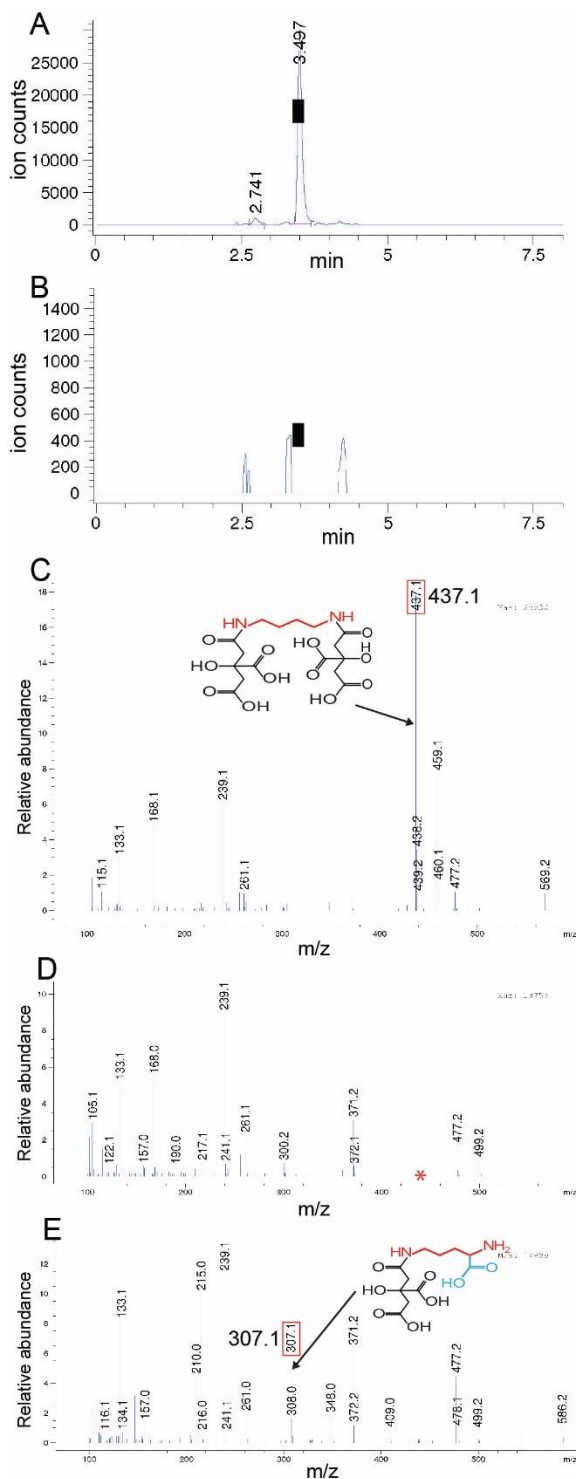

**Figure S3. Mass spectra of *in vitro* products of purified recombinant *F. novicida* FigA and FigC activity.** *A,B*, Extracted Ion Chromatograms (EIC) for the mass of rhizoferrin (437/438). *A*, Products of *R. pickettii* NIS synthetase with putrescine and Na-citrate substrates; *B*, no enzyme control. *C*, Products of FigA and FigC activity with L-ornithine and Na-citrate. A mass for rhizoferrin (437.1) and its sodium adduct at *m/z* 459.1 are present. *D*, No enzyme control with L-ornithine and Na-citrate. The red asterisk indicates the absence of a mass for rhizoferrin. *E*, Products of FigA in the absence of FigC with L-ornithine and Na-citrate. A mass for rhizoferrin is absent and a mass for citrylornithine (*m/z* 307.1) is present.
